# Supplementary material for: The Interplay between Mutagenesis and Extrachromosomal DNA Shapes Urothelial Cancer Evolution
Source: bioRxiv or medRxiv preprint supplement (doi:10.1101/2023.05.07.538753), 2023-05-07
Supplement: Supplementary file [file media-14.pdf]

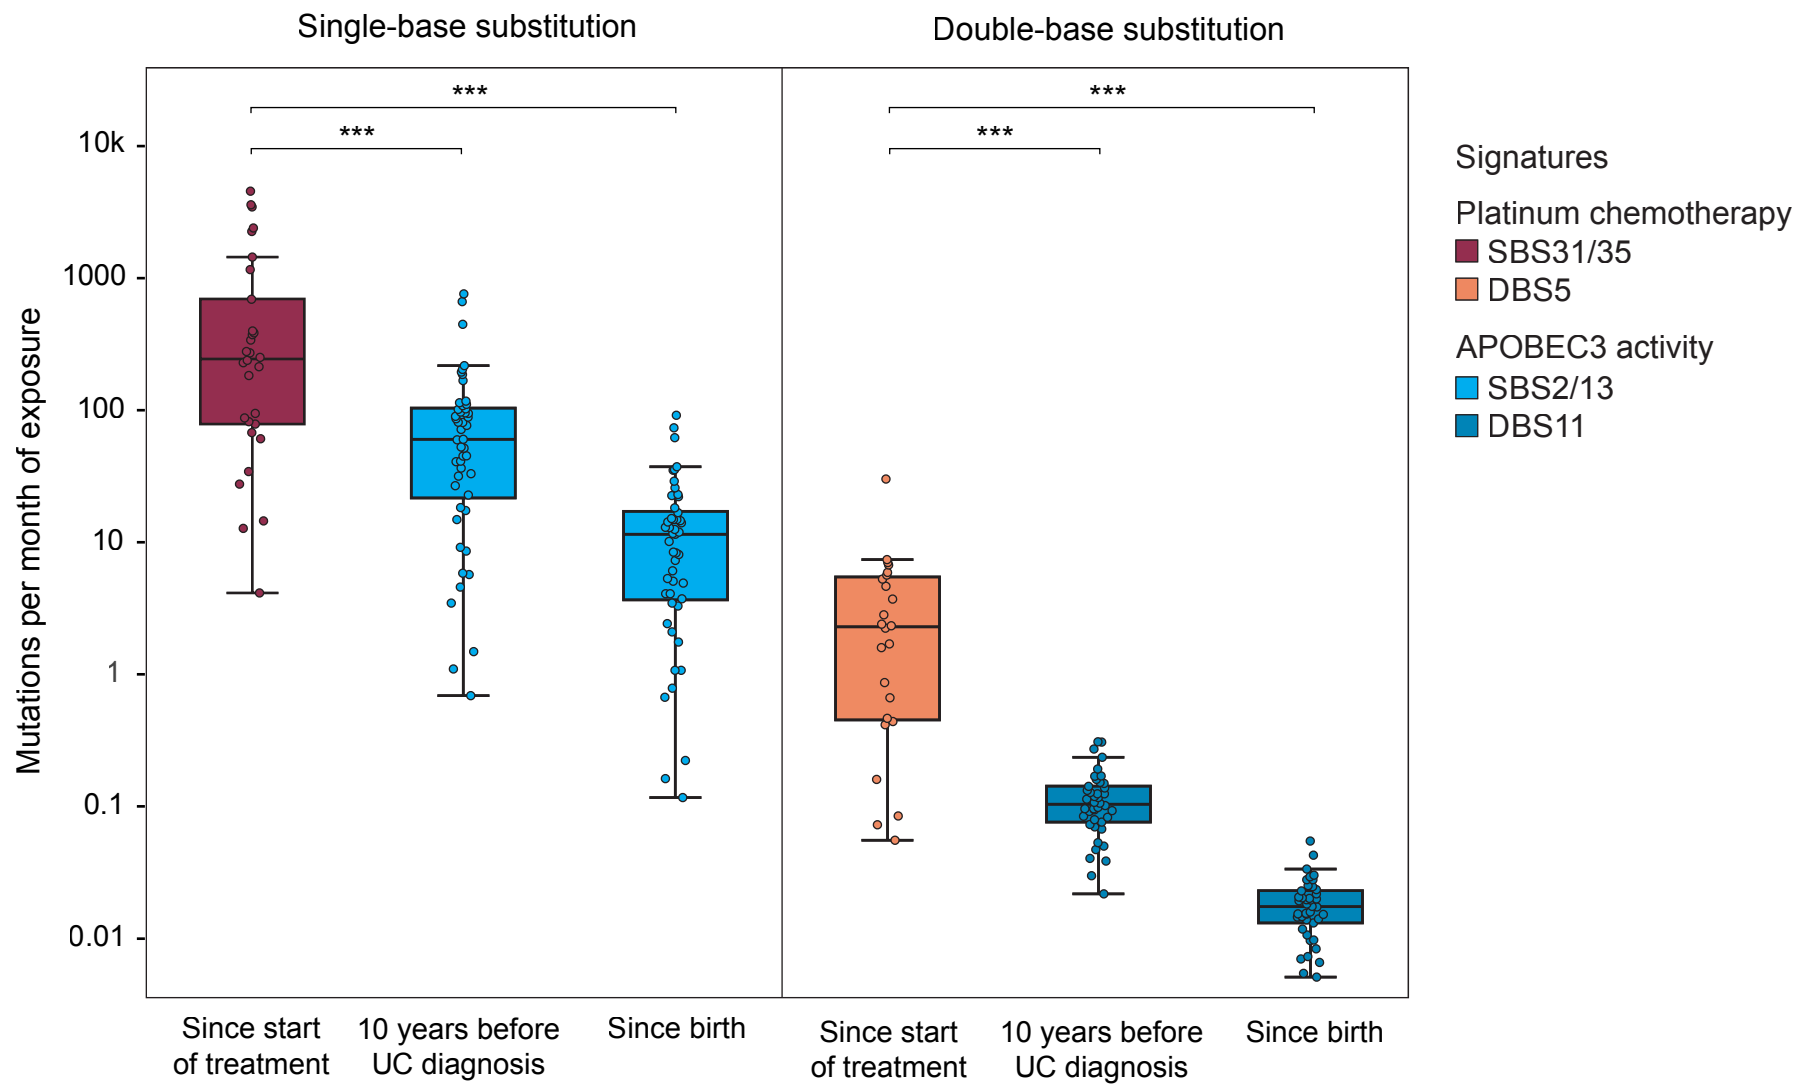

Platinum chemotherapy has higher mutagenic velocity than APOBEC3
