# Supplementary material for: The Interplay between Mutagenesis and Extrachromosomal DNA Shapes Urothelial Cancer Evolution
Source: bioRxiv or medRxiv preprint supplement (doi:10.1101/2023.05.07.538753), 2023-05-07

SV events

- Simple events
  - Translocation
  - Inversion
  - Inverted duplication
  - Deletion
  - Duplication

- Complex events
  - Tyfonas
  - Breakage-fusion-bridges (BFB)
  - Double minute (DM)
  - Chromothripsis
  - Chromoplexy
  - Rigma
  - Pyrgo
  - Quasi-reciprocal pairs (QRP)
  - Templated insertion chains (TIC)

**a**

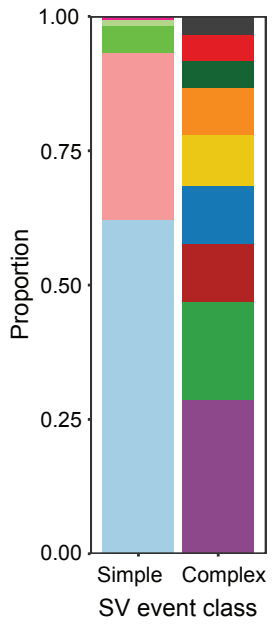

**b**

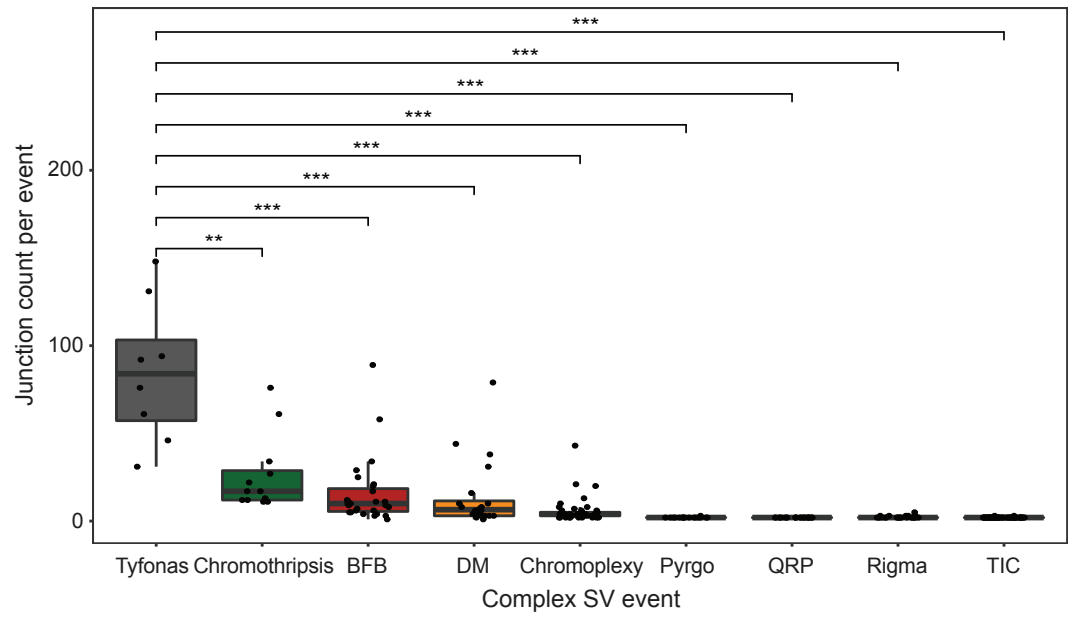

Supplement: Supplementary file [file media-15.pdf]
