# Supplementary material for: The Interplay between Mutagenesis and Extrachromosomal DNA Shapes Urothelial Cancer Evolution
Source: bioRxiv or medRxiv preprint supplement (doi:10.1101/2023.05.07.538753), 2023-05-07

**b** ● Kyklonas ● Non-clustered APOBEC3 (SBS2/13) ● Platinum chemotherapy (SBS31/35)

WCMIVG056S01

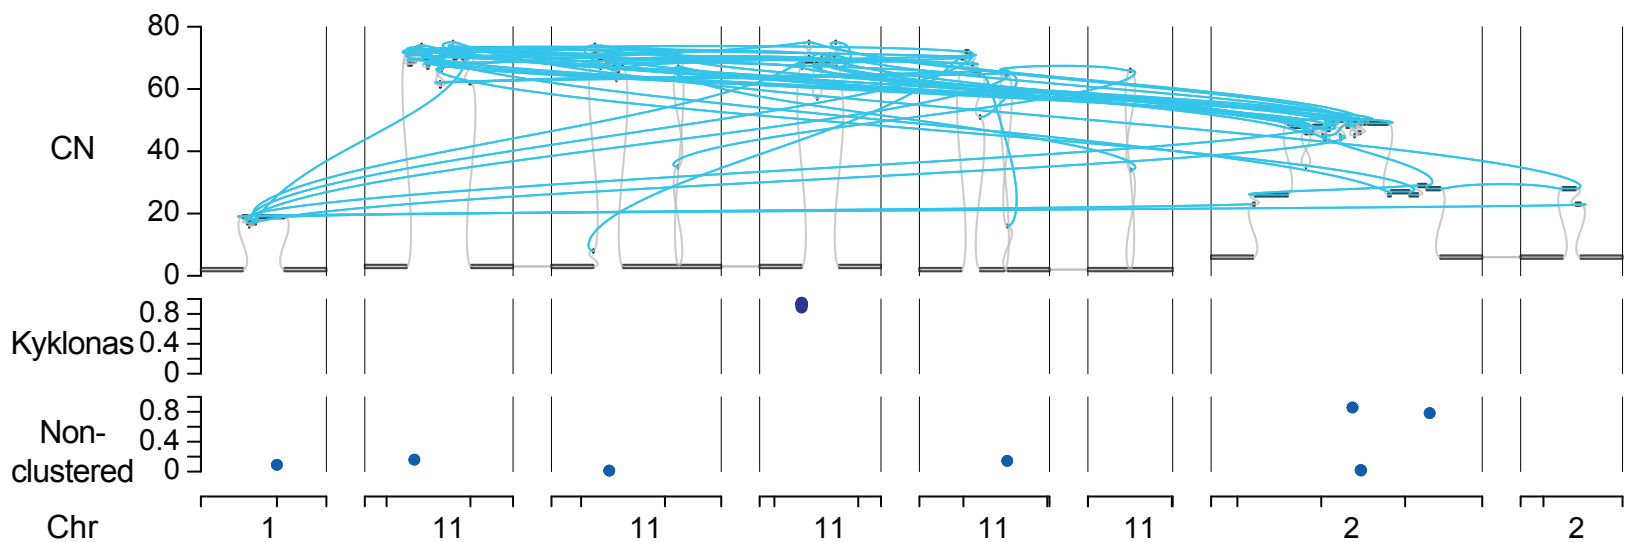

WCMIVG057S01

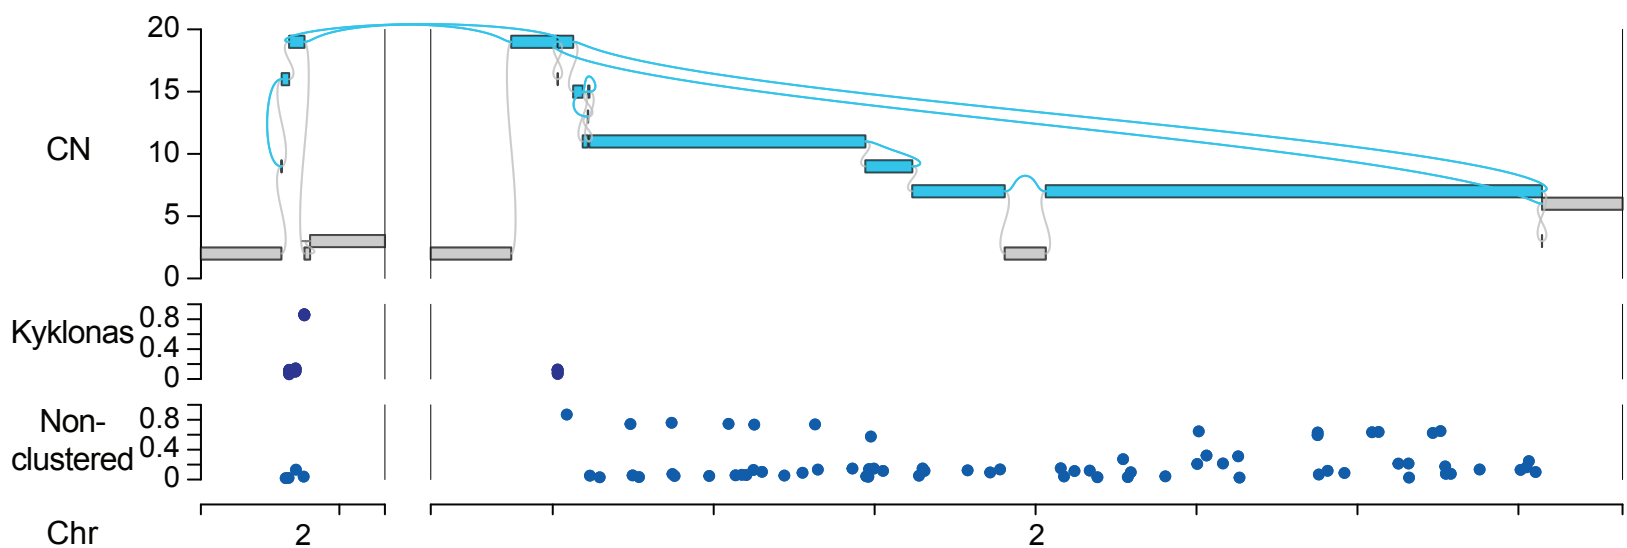

WCMIVG057S01

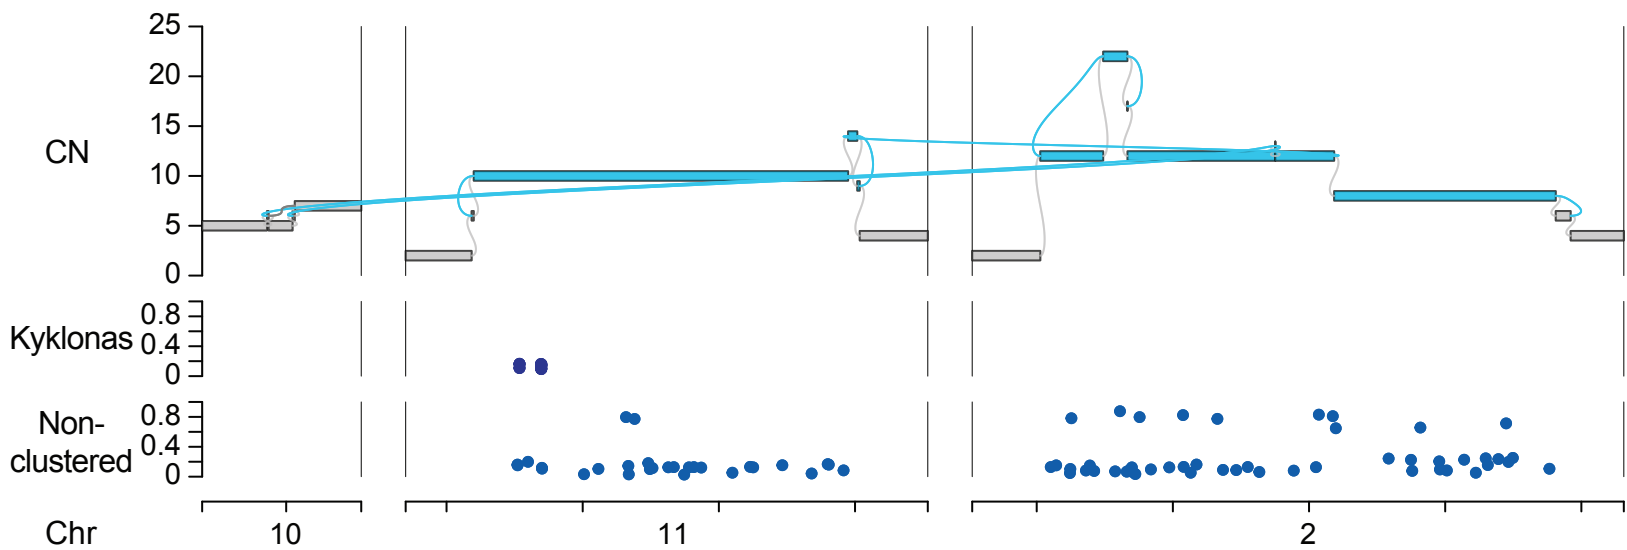

Supplement: Supplementary file [file media-19.pdf]
