# Supplementary material for: The Interplay between Mutagenesis and Extrachromosomal DNA Shapes Urothelial Cancer Evolution
Source: bioRxiv or medRxiv preprint supplement (doi:10.1101/2023.05.07.538753), 2023-05-07

c ● Kyklonas ● Non-clustered APOBEC3 (SBS2/13) ● Platinum chemotherapy (SBS31/35)

WCMIVG057S01

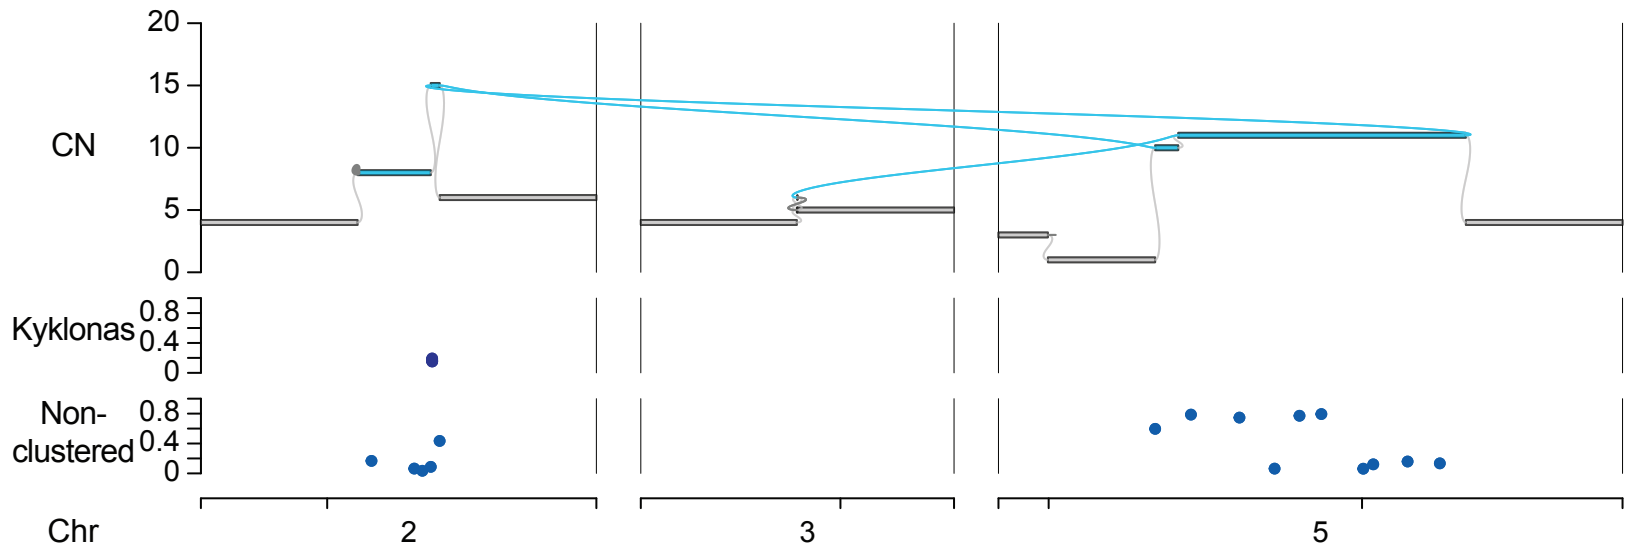

WCMIVG062S01

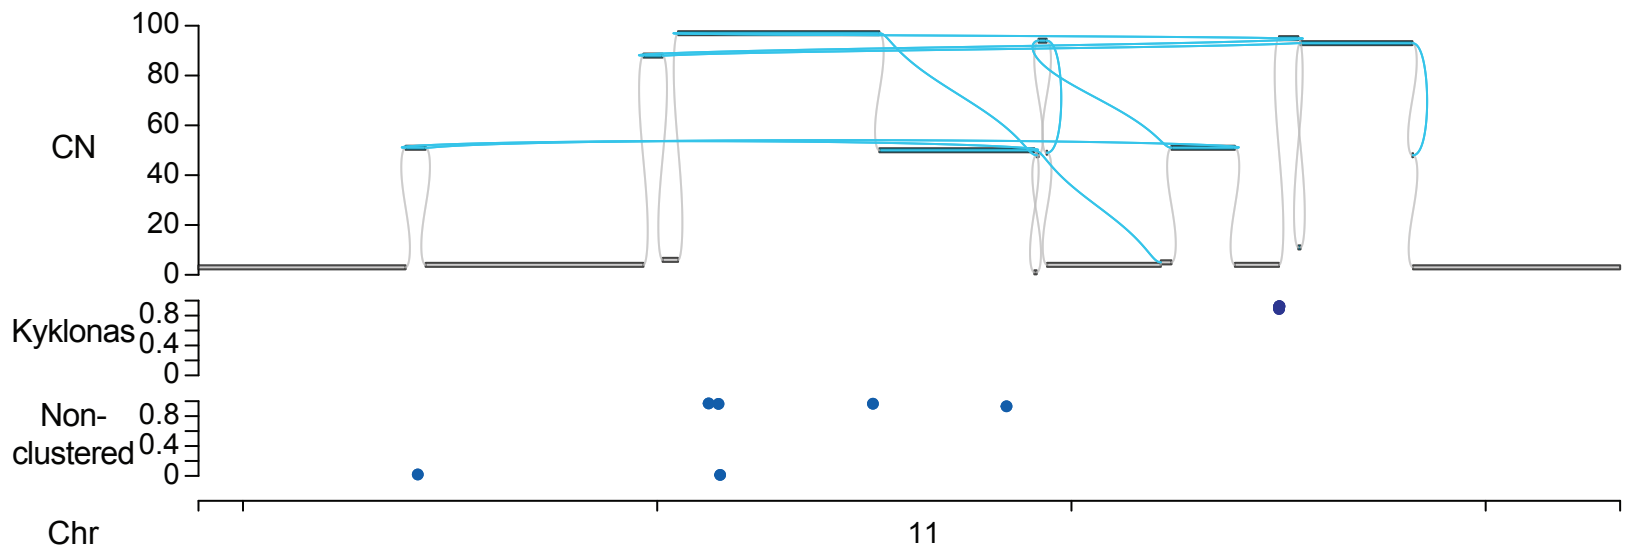

WCMIVG065S02

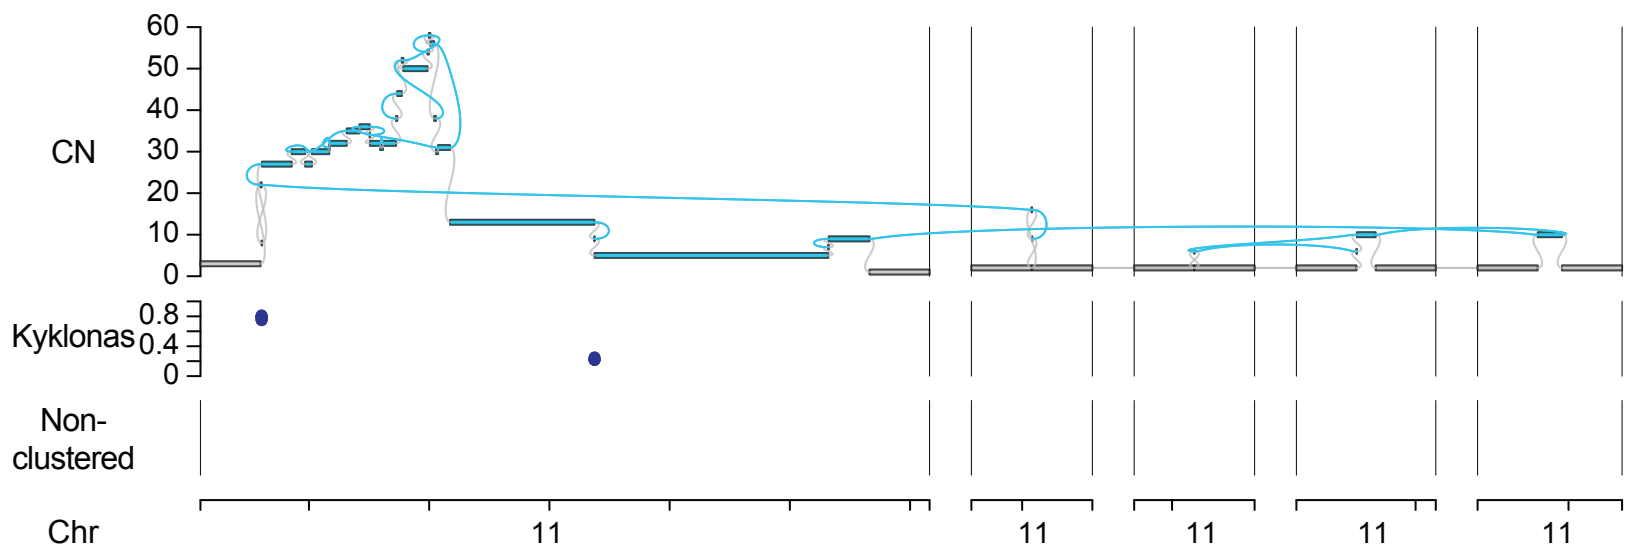

Supplement: Supplementary file [file media-20.pdf]
