# Supplementary material for: The Interplay between Mutagenesis and Extrachromosomal DNA Shapes Urothelial Cancer Evolution
Source: bioRxiv or medRxiv preprint supplement (doi:10.1101/2023.05.07.538753), 2023-05-07

j

● Kyklonas

● Non-clustered APOBEC3 (SBS2/13)

● Platinum chemotherapy (SBS31/35)

WCMIVG013S06

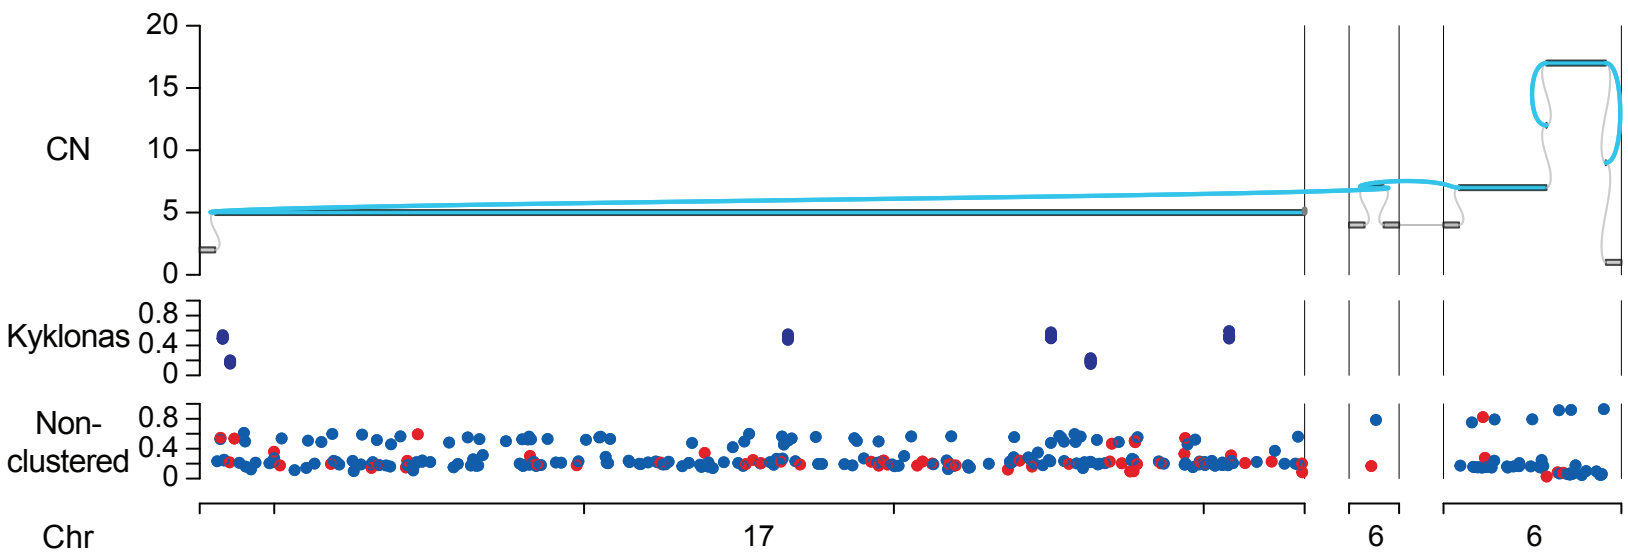

Supplement: Supplementary file [file media-27.pdf]
